# Supplementary material for: A single-stage purification method for the precise determination of zirconium isotopic composition in geological samples by double spike MC-ICP-MS
Source: Royal Society of Chemistry journal article supplement (doi:10.1039/d4ja00332b), 2024-01-01
Supplement: d4ja00332b1.xlsx [file d4ja00332b1.xlsx]

## Sheet: Sheet1
Table S1. The Zr isotopic compositions of eight geological reference materials determined by DS-MC-ICP-MS in this study.
Reference material	Lithology	Double spike (%)	δ94ZrNIST (‰)	2SD	N
AGV-2	Andesite	41.6598	-0.0243216	0.0343909
		41.7745	-0.0339071	0.0336078
		43.75	-0.0552602	0.0434303
		43.8119	-0.0683367	0.0116863
		43.507	-0.0369354	0.0357868
		54.129	-0.052	0.0225389
		51.629	-0.0456667	0.0277369
		51.374	-0.0523333	0.0311341
		Average	-0.0460951	0.0278689	8
BCR-2	Basalt	41.8251	-0.0175157	0.0413759
		41.978	0.0125385	0.0266119
		42.1373	0.0312263	0.0135252
		41.9403	0.00114372	0.0506912
		42.6168	0.0123461	0.056893
		44.0202	0.0234384	0.0367573
		43.3129	0.0239908	0.010265
		45.2464	0.00223559	0.0225752
		Average	0.0111755	0.0313835	8
BHVO-2	Basalt	51.6867	0.034	0.0576541
		42.2428	0.0444944	0.0383018
		42.1786	0.0601575	0.0531665
		42.2428	0.0176959	0.0406219
		43.9671	-0.00255661	0.0386637
		41.6151	0.0192697	0.0307146
		54.3313	0.012	0.01249
		50.1373	0.005	0.0334066
		Average	0.0237576	0.0420835	8
GSP-2	Granodiorite	45.403	0.0587049	0.0270757
		45.2944	0.0569652	0.0114243
		44.8412	0.0525824	0.0443673
		43.3439	0.0513603	0.0496282
		44.8206	0.0611003	0.0349415
		48.804	0.058	0.0519615
		53.4107	0.0383333	0.0160416
		Average	0.0538638	0.0153109	7
RGM-2	Rhyolite	41.6151	0.0742846	0.0605643
		41.8729	0.116598	0.00826878
		44.8051	0.0749814	0.0348797
		44.5783	0.104208	0.0419643
		44.6062	0.0961322	0.0164761
		Average	0.093241	0.0369724	5
SBC-1	Shale	41.9327	0.0316023	0.01908
		42.1526	0.0548577	0.00351244
		43.8384	0.0348399	0.0576139
		43.9098	0.0679482	0.0354883
		44.6857	0.0704108	0.0237482
		Average	0.0519318	0.0362213	5
SGR-1	Shale	46.1166	0.0249789	0.00842476
		46.1299	0.018873	0.0179799
		47.6418	0.0119111	0.0705787
		47.8855	0.0258725	0.0371904
		46.6195	0.0279487	0.0671159
		Average	0.0219168	0.0130685	5
W-2a	Diabase	43.2826	-0.0406303	0.0347516
		43.0183	-0.0415836	0.0368076
		47.1494	0.0256116	0.0289372
		46.2863	-0.042041	0.0463269
		40.9792	0.00461497	0.015367
		Average	-0.0188057	0.0636902	5
